# Supplementary material for: Meropenem Stability in Human Plasma at −20 °C: Detailed Assessment of Degradation
Source: MDPI journal article supplement (doi:10.3390/antibiotics10040449), 2021-04-16
Supplement: s1 [file s1]

## Table S1. Critical threshold values

**Table S1.** Critical threshold values for each concentration, as simulated based on the polynomial model. The critical threshold corresponds to the duration at which the lower 95% confidence interval of the simulated meropenem degradation at -20°C crosses 85% of the initial meropenem concentration.

| Experiment Number | Critical threshold (days) |
|-------------------|---------------------------|
| E1 (0.44 mg/L)    | 135                       |
| E2 (4.38 mg/L)    | 127                       |
| E3 (17.5 mg/L)    | 105                       |
| E4 (35.1 mg/L)    | 82                        |
| E5 (52.6 mg/L)    | 74                        |
| E6 (70.1 mg/L)    | 76                        |
| E7 (87.6 mg/L)    | 80                        |
